# Supplementary material for: Gradual Restraint Habituation for Awake Functional Magnetic Resonance Imaging Combined With a Sparse Imaging Paradigm Reduces Motion Artifacts and Stress Levels in Rodents
Source: PubMed Central journal article supplement (PMC8724036; doi:10.3389/fnins.2021.805679), 2021-12-21
Supplement: Table_1.pdf [file Table_1.pdf]

| Habituation phase   | Rat | Weight (g) | Mean (g) ±S.E.M. |
|---------------------|-----|------------|------------------|
| Pre-handling        | SJ1 | 143        | 138±5            |
|                     | SJ2 | 122        |                  |
|                     | SJ3 | 158        |                  |
|                     | SJ4 | 144        |                  |
|                     | SJ5 | 130        |                  |
|                     | SJ6 | 129        |                  |
| Handling Day1       | SJ1 | 143        | 138±5            |
|                     | SJ2 | 121        |                  |
|                     | SJ3 | 159        |                  |
|                     | SJ4 | 144        |                  |
|                     | SJ5 | 133        |                  |
|                     | SJ6 | 129        |                  |
| Handling Day2       | SJ1 | 145        | 141±5            |
|                     | SJ2 | 124        |                  |
|                     | SJ3 | 161        |                  |
|                     | SJ4 | 146        |                  |
|                     | SJ5 | 134        |                  |
|                     | SJ6 | 133        |                  |
| Handling Day3       | SJ1 | 151        | 145±5            |
|                     | SJ2 | 129        |                  |
|                     | SJ3 | 164        |                  |
|                     | SJ4 | 151        |                  |
|                     | SJ5 | 139        |                  |
|                     | SJ6 | 137        |                  |
| Body restraint Day1 | SJ1 | 165        | 159±6            |
|                     | SJ2 | 140        |                  |
|                     | SJ3 | 182        |                  |
|                     | SJ4 | 160        |                  |
|                     | SJ5 | 151        |                  |
|                     | SJ6 | 156        |                  |
| Body restraint Day2 | SJ1 | 168        | 162±6            |
|                     | SJ2 | 142        |                  |
|                     | SJ3 | 185        |                  |
|                     | SJ4 | 166        |                  |
|                     | SJ5 | 153        |                  |
|                     | SJ6 | 158        |                  |
| Body restraint Day3 | SJ1 | 176        | 169±6            |
|                     | SJ2 | 151        |                  |
|                     | SJ3 | 191        |                  |
|                     | SJ4 | 174        |                  |
|                     | SJ5 | 156        |                  |
|                     | SJ6 | 163        |                  |
| Darkness Day1       | SJ1 | 197        | 185±6            |
|                     | SJ2 | 171        |                  |
|                     | SJ3 | 209        |                  |
|                     | SJ4 | 183        |                  |
|                     | SJ5 | 172        |                  |
|                     | SJ6 | 175        |                  |
| Darkness Day2       | SJ1 | 198        | 186±6            |
|                     | SJ2 | 171        |                  |
|                     | SJ3 | 211        |                  |
|                     | SJ4 | 185        |                  |
|                     | SJ5 | 175        |                  |
|                     | SJ6 | 175        |                  |
| Darkness Day3       | SJ1 | 198        | 188±6            |
|                     | SJ2 | 175        |                  |
|                     | SJ3 | 212        |                  |
|                     | SJ4 | 187        |                  |
|                     | SJ5 | 178        |                  |
|                     | SJ6 | 177        |                  |
| Habituation         | Rat | Weight     | Mean (g)         |

| phase                |     | (g) | ±S.E.M. |
|----------------------|-----|-----|---------|
| MRI noise Day1       | SJ1 | 203 | 196±5   |
|                      | SJ2 | 183 |         |
|                      | SJ3 | 218 |         |
|                      | SJ4 | 199 |         |
|                      | SJ5 | 184 |         |
|                      | SJ6 | 190 |         |
| MRI noise Day2       | SJ1 | 205 | 198±6   |
|                      | SJ2 | 184 |         |
|                      | SJ3 | 220 |         |
|                      | SJ4 | 200 |         |
|                      | SJ5 | 184 |         |
|                      | SJ6 | 192 |         |
| MRI noise Day3       | SJ1 | 208 | 200±6   |
|                      | SJ2 | 188 |         |
|                      | SJ3 | 223 |         |
|                      | SJ4 | 201 |         |
|                      | SJ5 | 186 |         |
|                      | SJ6 | 194 |         |
| Head fixation Day1   | SJ1 | 220 | 212±5   |
|                      | SJ2 | 198 |         |
|                      | SJ3 | 230 |         |
|                      | SJ4 | 215 |         |
|                      | SJ5 | 201 |         |
|                      | SJ6 | 210 |         |
| Head fixation Day2   | SJ1 | 224 | 214±5   |
|                      | SJ2 | 200 |         |
|                      | SJ3 | 231 |         |
|                      | SJ4 | 217 |         |
|                      | SJ5 | 202 |         |
|                      | SJ6 | 210 |         |
| Head fixation Day3   | SJ1 | 226 | 215±5   |
|                      | SJ2 | 202 |         |
|                      | SJ3 | 231 |         |
|                      | SJ4 | 218 |         |
|                      | SJ5 | 203 |         |
|                      | SJ6 | 212 |         |
| MRI acquisition Day1 | SJ1 | 231 | 220±5   |
|                      | SJ2 | 206 |         |
|                      | SJ3 | 234 |         |
|                      | SJ4 | 226 |         |
|                      | SJ5 | 209 |         |
|                      | SJ6 | 216 |         |
| MRI acquisition Day2 | SJ1 | 234 | 224±4   |
|                      | SJ2 | 211 |         |
|                      | SJ3 | 238 |         |
|                      | SJ4 | 229 |         |
|                      | SJ5 | 215 |         |
|                      | SJ6 | 218 |         |
| MRI acquisition Day3 | SJ1 | 236 | 227±4   |
|                      | SJ2 | 215 |         |
|                      | SJ3 | 240 |         |
|                      | SJ4 | 232 |         |
|                      | SJ5 | 218 |         |
|                      | SJ6 | 220 |         |
| Auditory task        | SJ1 | 249 | 239±5   |
|                      | SJ2 | 223 |         |
|                      | SJ3 | 255 |         |
|                      | SJ4 | 241 |         |
|                      | SJ5 | 230 |         |
|                      | SJ6 | 234 |         |

### **Supplementary Table 1**

The table describes the body weight of the rats (n=6) during the habituation procedure and the auditory fMRI acquisition phase. No signs of abnormal weight gain or loss was evident.
